# Supplementary material for: Design of mesoporous silica hybrid materials as sorbents for the selective recovery of rare earth metals
Source: Royal Society of Chemistry journal article supplement (doi:10.1039/c4ta06860b), 2015-01-01
Supplement: c4ta06860b1.pdf [file c4ta06860b1.pdf]

*Figures:*

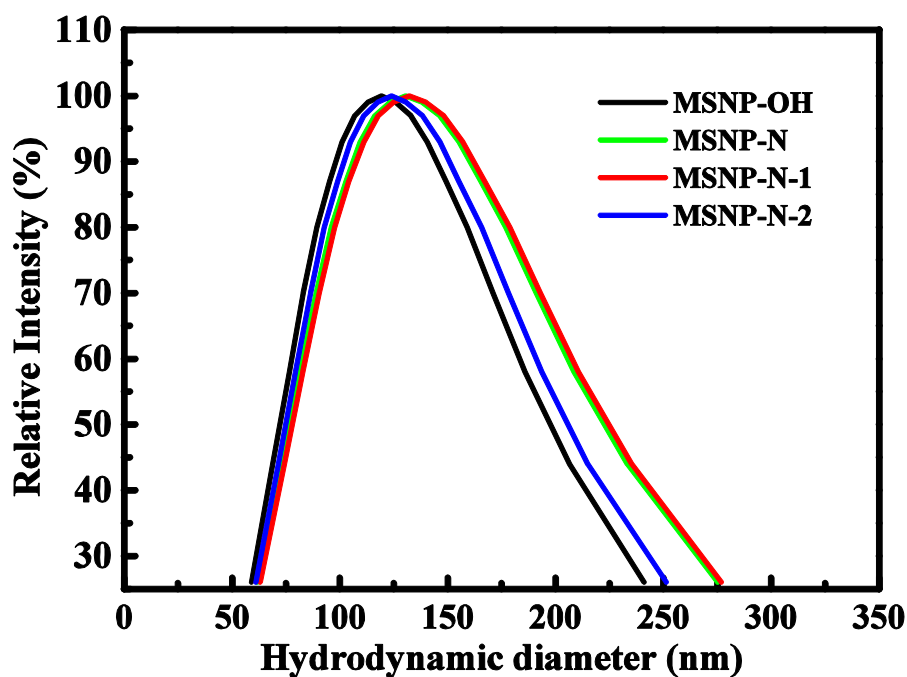

Fig. S1. Hydrodynamic diameter distributions of MSNP-OH, MSNP-N, MSNP-N-1, and MSNP-N-2 in water. All particles were suspended at a concentration of 100  $\mu\text{g/mL}$ .

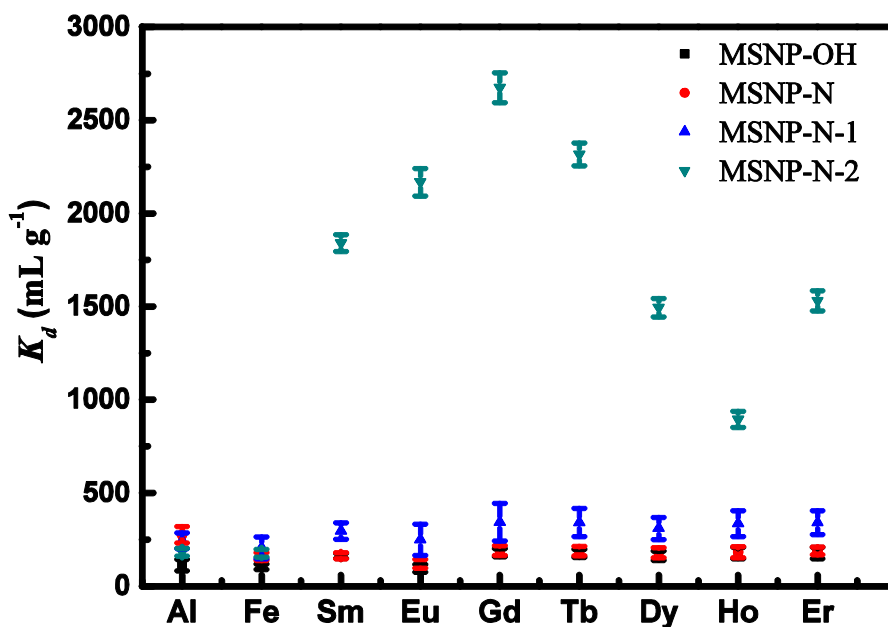

Fig. S2.  $K_d$  values of the hybrid materials for a mixture of Al, Fe, Sm, Eu, Gd, Tb, Dy, Ho, and Er. Error bars represent the standard derivation.

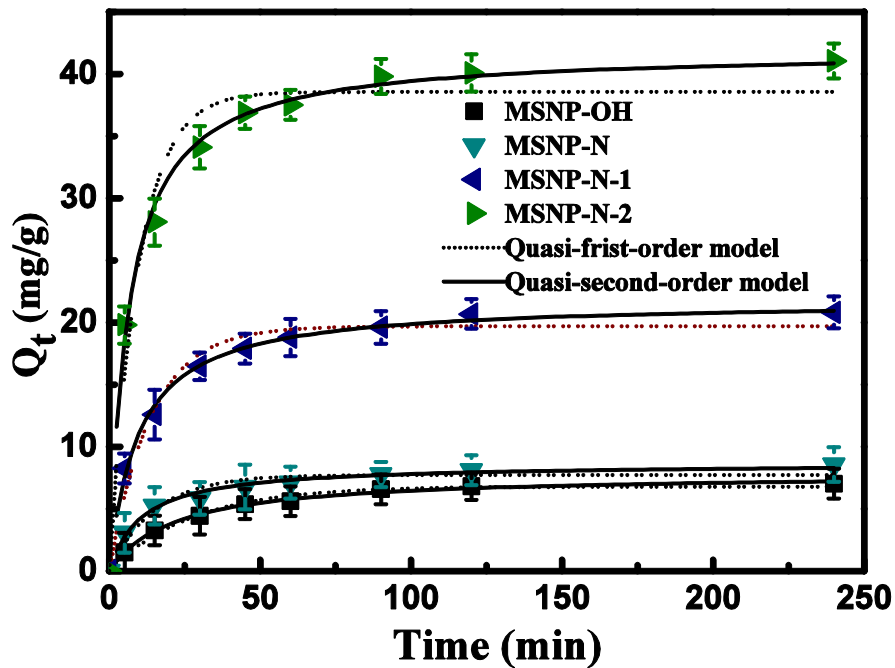

Fig. S3. Kinetic data and modelling for the adsorption of Gd<sup>3+</sup> on MSNP-OH, MSNP-N, MSNP-N-1, and MSNP-N-2. Error bars represent the standard derivation.

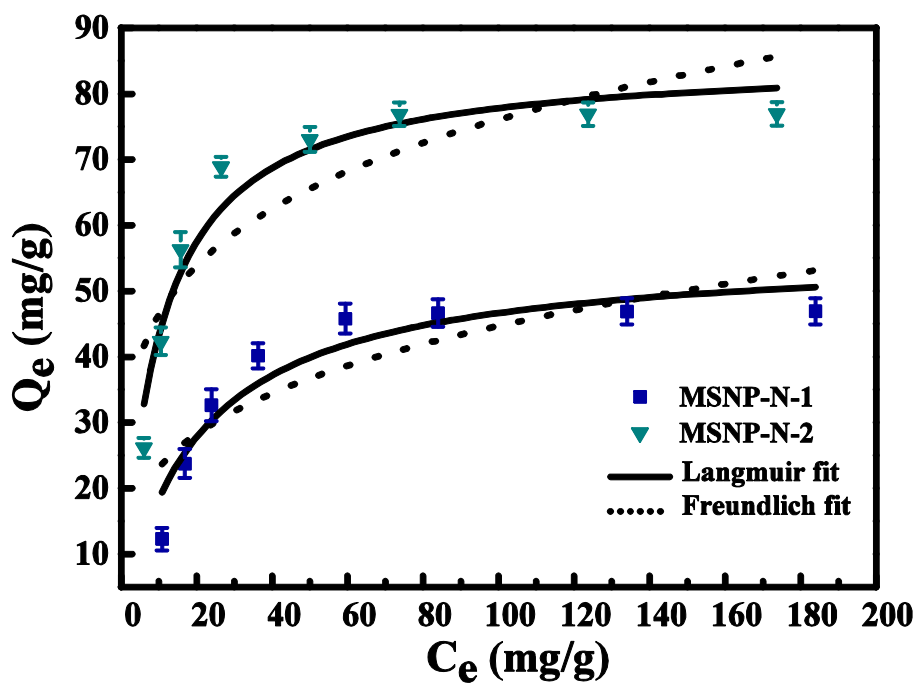

Fig. S4. Equilibrium data and modelling for the adsorption of Gd<sup>3+</sup> on MSNP-OH, MSNP-N, MSNP-N-1, and MSNP-N-2. Error bars represent the standard derivation.

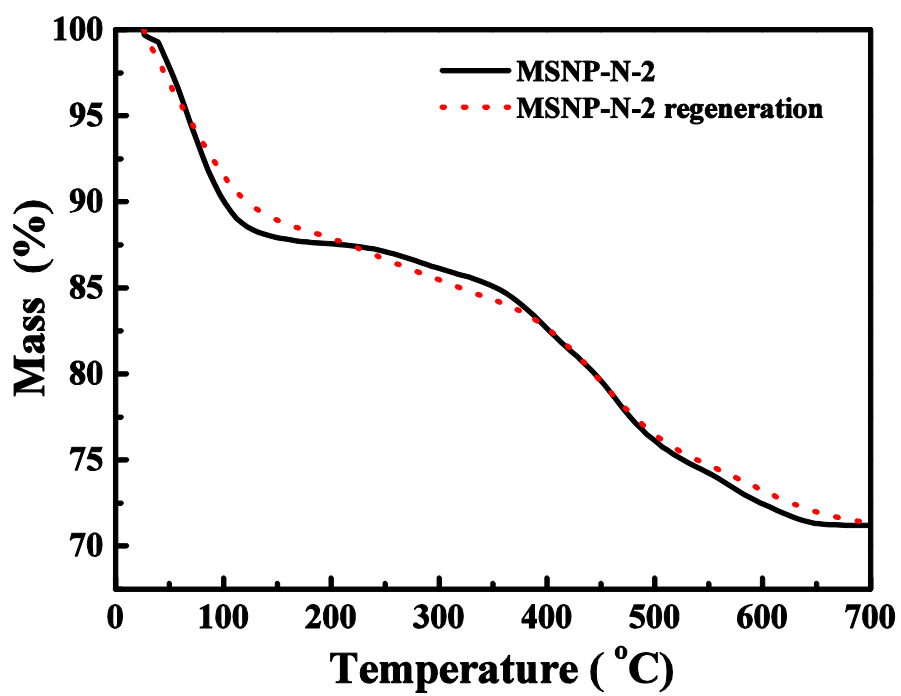

Fig. S5. TGA analysis for MSNP-N-2 before and after the regeneration tests.
